# Supplementary material for: Stimulation-induced differential redistributions of clathrin and clathrin-coated vesicles in axons compared to soma/dendrites
Source: PubMed Central journal article supplement (PMC7565815; doi:10.1186/s13041-020-00683-5), 2020-10-16
Supplement: 13041_2020_683_MOESM1_ESM.pdf [file 13041_2020_683_MOESM1_ESM.pdf]

Additional File 1. Methods on size measurement and scoring of CCV/CCP in soma/dendrites.

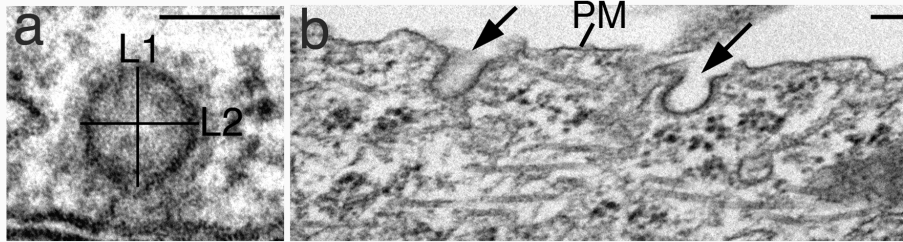

(a) Average diameter of CCV =  $(L1 + L2) / 2$ .

(b) Clathrin-coated pits (CCP) on plasma membrane (PM) of neuronal somas were identified by the characteristic coats on the cytoplasmic side of the omega figures (arrows). Scale bars = 100 nm.
