# Supplementary material for: Stimulation-induced differential redistributions of clathrin and clathrin-coated vesicles in axons compared to soma/dendrites
Source: PubMed Central journal article supplement (PMC7565815; doi:10.1186/s13041-020-00683-5), 2020-10-16
Supplement: 13041_2020_683_MOESM5_ESM.pdf [file 13041_2020_683_MOESM5_ESM.pdf]

**Additional File 5. Number of CCVs and CCPs per 100 presynaptic profiles in perfusion-fixed brains (5A) and dissociated cultures (5B).**

| <b>5A</b>             | <b>Fast perfusion</b> | <b>Delayed perfusion</b>                            |
|-----------------------|-----------------------|-----------------------------------------------------|
| Rat cerebral cortex   | 4.7 (43)              | 79.2 (48)                                           |
| Mouse cerebral cortex | 5.9 (51)              | 98.9 (47)                                           |
|                       | 28.6 (35)             | 135.3 (34)                                          |
| Mouse cerebellum      | 6.8 (44)              | 61.1 (54)                                           |
|                       | 21.1 (38)             | 116.7 (18)                                          |
| Mouse hippocampus CA1 | 12.7 (55)             | 95.7 (46)                                           |
|                       | 7.5 (67)              | 76.9 (26)                                           |
| <b>Mean ± SEM</b>     | <b>12.5 ± 3.4</b>     | <b>94.8 ± 9.6</b><br><b>P &lt; 0.0001, paired t</b> |

| <b>5B</b>         | <b>control</b>    | <b>High K<sup>+</sup></b>                |
|-------------------|-------------------|------------------------------------------|
| Exp 1             | 10 (40)           | 49.1 (53)                                |
| Exp 2             | 10 (50)           | 48.1 (54)                                |
| Exp 3             | 16.7 (30)         | 14.3 (21)                                |
| Exp 4             | 21.2 (33)         | 15.2 (33)                                |
| <b>Mean ± SEM</b> | <b>14.5 ± 2.7</b> | <b>31.7 ± 9.8</b><br><b>NS, paired t</b> |

(n) = number of presynaptic profiles scored.

NS, not significant.
