# Supplementary material for: Stimulation-induced differential redistributions of clathrin and clathrin-coated vesicles in axons compared to soma/dendrites
Source: PubMed Central journal article supplement (PMC7565815; doi:10.1186/s13041-020-00683-5), 2020-10-16
Supplement: 13041_2020_683_MOESM6_ESM.pdf [file 13041_2020_683_MOESM6_ESM.pdf]

**Additional File 6. Density and median distance of label for clathrin at presynaptic terminals under control and depolarizing conditions.**

|                                                     | <b>Density</b><br>[number of labels within 200 nm of PM<br>/ $\mu\text{m}$ presynaptic membrane] |                           |                                                     | <b>Median Distance</b><br>[nm, from presynaptic<br>membrane] |                                                 |
|-----------------------------------------------------|--------------------------------------------------------------------------------------------------|---------------------------|-----------------------------------------------------|--------------------------------------------------------------|-------------------------------------------------|
|                                                     | <b>control</b>                                                                                   | <b>High K<sup>+</sup></b> | <b>% control</b>                                    | <b>control</b>                                               | <b>High K<sup>+</sup></b>                       |
| Exp 1                                               | 3.9 $\pm$ 1.0<br>(n=29)                                                                          | 15.9 $\pm$ 2.3<br>(n=33)  | 408%<br>P<0.0001                                    | 147<br>(n=47)                                                | 87<br>(n=147)<br>P<0.0001                       |
| Exp 2                                               | 1.8 $\pm$ 0.6<br>(n=20)                                                                          | 7.9 $\pm$ 1.0<br>(n=25)   | 439%<br>P<0.0001                                    | 177<br>(n=12)                                                | 87<br>(n=84)<br>P<0.005                         |
| Exp 3                                               | 4.7 $\pm$ 1.2<br>(n=25)                                                                          | 11.8 $\pm$ 3.1<br>(n=16)  | 251%<br>P<0.05                                      | 127<br>(n=35)                                                | 90<br>(n=56)<br>Not significant                 |
| <b>Mean <math>\pm</math><br/>SEM<br/>(Paired t)</b> |                                                                                                  |                           | <b>366 <math>\pm</math> 58%</b><br><b>P&lt;0.05</b> | <b>150 <math>\pm</math> 15</b>                               | <b>88 <math>\pm</math> 1</b><br><b>P&lt;0.1</b> |

For density of label, (n)= number of synaptic profiles measured; for distance of label, (n) = number of labels measured.

Statistical analysis within each experiment: Student's t-test for density; Wilcoxon test for median distance.
