# Supplementary material for: Stimulation-induced differential redistributions of clathrin and clathrin-coated vesicles in axons compared to soma/dendrites
Source: PubMed Central journal article supplement (PMC7565815; doi:10.1186/s13041-020-00683-5), 2020-10-16
Supplement: 13041_2020_683_MOESM7_ESM.pdf [file 13041_2020_683_MOESM7_ESM.pdf]

**Additional File 7. Number of clathrin-labeled CCVs and CCPs measured at 1  $\mu\text{m}$  depth of cytoplasm from PM /  $\mu\text{m}$  PM under control and depolarizing conditions.**

|                                  | <b>Control</b>                    | <b>High K<sup>+</sup></b>                                         |
|----------------------------------|-----------------------------------|-------------------------------------------------------------------|
| Exp 1                            | 0.48 $\pm$ 0.06 (14)              | 0.14 $\pm$ 0.04 (17)<br>P<0.0005                                  |
| Exp 2                            | 0.58 $\pm$ 0.06 (14)              | 0.15 $\pm$ 0.03 (18)<br>P<0.0001                                  |
| Exp 3                            | 0.57 $\pm$ 0.06 (14)              | 0.15 $\pm$ 0.04 (15)<br>P<0.0001                                  |
| <b>Mean <math>\pm</math> SEM</b> | <b>0.54 <math>\pm</math> 0.03</b> | <b>0.15 <math>\pm</math> 0.01</b><br><b>P&lt;0.005 (paired t)</b> |

(n) = number of somas sampled.

Means within each experiment tested by Student's t-test.

Methods of measurement are detailed in Additional File 3.
