# Supplementary material for: Stimulation-induced differential redistributions of clathrin and clathrin-coated vesicles in axons compared to soma/dendrites
Source: PubMed Central journal article supplement (PMC7565815; doi:10.1186/s13041-020-00683-5), 2020-10-16
Supplement: 13041_2020_683_MOESM8_ESM.pdf [file 13041_2020_683_MOESM8_ESM.pdf]

**Additional File 8. Number of CCPs per neuronal soma under control and depolarizing conditions**

|                   | <b>Control</b>   | <b>High K<sup>+</sup></b>                      |
|-------------------|------------------|------------------------------------------------|
| Exp 1             | 6.0 ± 1.2 (10)   | 2.7 ± 0.9 (10)<br>P<0.05                       |
| Exp 2             | 5.3 ± 0.9 (12)   | 2.1 ± 0.7 (15)<br>P<0.01                       |
| <b>Mean ± SEM</b> | <b>5.7 ± 0.4</b> | <b>2.4 ± 0.3</b><br><b>P&lt;0.01, paired t</b> |

(n) = number of neuronal somas scored.

Means within each experiment tested by Student's t-test.
