# Supplementary material for: Stimulation-induced differential redistributions of clathrin and clathrin-coated vesicles in axons compared to soma/dendrites
Source: PubMed Central journal article supplement (PMC7565815; doi:10.1186/s13041-020-00683-5), 2020-10-16
Supplement: 13041_2020_683_MOESM9_ESM.pdf [file 13041_2020_683_MOESM9_ESM.pdf]

**Additional File 9. Number of peri-PSD CCP under resting and depolarizing conditions**

|                                                         | <b>control</b>       | <b>High K<sup>+</sup></b> |
|---------------------------------------------------------|----------------------|---------------------------|
| Exp 1                                                   | 3 (73)               | 1 (76)                    |
| Exp 2                                                   | 0 (51)               | 0 (29)                    |
| Exp 3                                                   | 1 (44)               | 0 (40)                    |
| Exp 4                                                   | 0 (53)               | 0 (41)                    |
| Exp 5                                                   | 1 (98)               | 2 (55)                    |
| Exp 6                                                   | 0 (52)               | 2 (84)                    |
| Exp 7                                                   | 1 (65)               | 1 (58)                    |
| Exp 8                                                   | 0 (102)              | 0 (31)                    |
| Exp 9                                                   | 2 (28)               | 0 (38)                    |
| Exp 10                                                  | 1 (17)               | 1 (28)                    |
| <b>Pooled total</b>                                     | 9 (583)              | 7 (480)                   |
| <b>Normalized to<br/>Per 1000 synaptic<br/>profiles</b> | <b>15.4 / (1000)</b> | <b>14.6 / (1000)</b>      |

Peri-PSD CCP is defined as clathrin-coated pits within 30 nm of the postsynaptic density.

(n) = number of synaptic profiles examined.
